# Supplementary material
Source: PubMed Central journal article supplement (PMC1895162)
Supplement: blood_2004-07-2859_1.pdf [file blood_2004-07-2859_1.pdf]

| Patient | Seq-NO.   | Days Post-Transplant | PB Cells | Genomic Length | LAM Amplicon Length | Integrand-Host-Junction Sequence | Identity [%] | Chromosome | Sequence Orientation | Integration Locus | Genomic Locus / RefSeq Gene        |
|---------|-----------|----------------------|----------|----------------|---------------------|----------------------------------|--------------|------------|----------------------|-------------------|------------------------------------|
| 1       | 80852 H02 | 12                   | WBC      | 54             | 147                 | TCCATTTAATACAGTtgaagaccc         | 100          | 4          | plus                 | 48114519          | 1777bp upstream of TEC             |
| 1       | 78933 B06 | 12                   | WBC      | 177            | 270                 | GACCAGATGTGGGAAtgaagaccc         | 98.4         | 5          | plus                 | 94448967          | 6025bp upstream of MCTP1           |
| 1       | 78933 C06 | 12                   | WBC      | 139            | 232                 | TGCTATAGTTACCGCtgaagaccc         | 100          | 10         | minus                | 121145584         | 187767bp in Intron 3 of GRK5       |
| 1       | 80852 F01 | 12                   | WBC      | 26             | 119                 | ATAAAAGGGAAGCCTtgaagaccc         | 100          | 11         | plus                 | 128037827         | 31372bp upstream of FLI1           |
| 1       | 78933 A06 | 12                   | WBC      | 8              | 101                 | AATTAAAAtgaagaccc                |              |            |                      |                   | too short                          |
| 1       | 80852 A02 | 12                   | WBC      | 13             | 106                 | AATTACTGCCGGTtgaagaccc           |              |            |                      |                   | too short                          |
| 1       | 80852 B02 | 12                   | WBC      | 14             | 107                 | AATTATTTTAGCATtgaagaccc          |              |            |                      |                   | too short                          |
| 1       | 78933 B07 | 13                   | WBC      | 38             | 131                 | CACACACACTCATAAtgaagaccc         | 100          | 1          | minus                | 155874598         | 14878bp upstream of AIM2           |
| 1       | 78933 F07 | 13                   | WBC      | 77             | 170                 | GACCTCAGGTGATCCtgaagaccc         | 100          | 1          | plus                 | 164251126         | 3588bp in Intron1 of CREG1         |
| 1       | 78933 D07 | 13                   | WBC      | 52             | 145                 | TTGCTTACCCCACTGtgaagaccc         | 100          | 2          | minus                | 136728494         | 19044bp upstream of CXCR4          |
| 1       | 79697 C08 | 13                   | WBC      | 130            | 223                 | ATGTCACAGACAAAGtgaagaccc         | 100          | 2          | plus                 | 17225602          | 41799bp upstream of VSNL1          |
| 1       | 78933 H06 | 13                   | WBC      | 28             | 121                 | AACAAATGAGGTTAGtgaagaccc         | 100          | 6          | plus                 | 2935514           | 1582bp in Exon 1 of DKFZp686l15217 |
| 1       | 78933 E07 | 13                   | WBC      | 125            | 218                 | CTTGAAGGGTGGGTGtgaagaccc         | 100          | 7          | minus                | 94707759          | 1187bp in Intron 1 of PON2         |
| 1       | 80852 G03 | 13                   | WBC      | 289            | 382                 | CTCCCTATATGATTGtgaagaccc         | 100          | 7          | plus                 | 43647712          | 27533bp downstream of BLVRA        |
| 1       | 80852 C04 | 13                   | WBC      | 79             | 172                 | CCAATAGCCTACCTTtgaagaccc         | 100          | 8          | plus                 | 62757554          | 32002bp in Intron2 of ASPH         |
| 1       | 80852 G04 | 13                   | WBC      | 80             | 173                 | ATCGCTTGAACCCGGtgaagaccc         | 98.8         | 9          | minus                | 129009529         | 8983bp downstream of IER5L         |

|   |              |    |     |     |     |                          |      |    |       |           |                                  |
|---|--------------|----|-----|-----|-----|--------------------------|------|----|-------|-----------|----------------------------------|
| 1 | 80852<br>E04 | 13 | WBC | 51  | 144 | TTTAAGTGAAACATCtgaagaccc | 96.1 | 11 | minus | 104041347 | no Refseq gene within next 100kb |
| 1 | 78933<br>F06 | 13 | WBC | 27  | 120 | TCTGTCTTCAAGTTcgaagaccc  | 100  | 12 | minus | 107639068 | 11307bp upstream of CORO1C       |
| 1 | 80852<br>E03 | 13 | WBC | 278 | 371 | TCCAGTAAGAGCTATtgaagaccc | 99.7 | 12 | minus | 92744212  | 170593bp in Intron2 of CRADD     |
| 1 | 80852<br>A04 | 13 | WBC | 26  | 119 | GCCGTGCAATACCTTtgaagaccc | 100  | 12 | plus  | 15927381  | 768bp in Intron 1 of STRAP       |
| 1 | 80852<br>C03 | 13 | WBC | 118 | 211 | TTTTGAGTACATCAcgaagaccc  | 100  | 14 | plus  | 89156823  | no Refseq gene within next 100kb |
| 1 | 78933<br>A07 | 13 | WBC | 17  | 110 | TTAAAATATTAAGAGtgaagaccc |      |    |       |           | too short                        |
| 1 | 80852<br>A05 | 13 | WBC | 13  | 106 | GATTTTGTGCTAGtgaagaccc   |      |    |       |           | too short                        |
| 1 | 80852<br>D04 | 13 | WBC | 3   | 96  | AATtaaagaccc             |      |    |       |           | too short                        |
| 1 | 80852<br>F03 | 13 | WBC | 8   | 101 | AATTAGGcgaagaccc         |      |    |       |           | too short                        |
| 1 | 80852<br>H04 | 13 | WBC | 9   | 102 | AATTACCTtgaagaccc        |      |    |       |           | too short                        |
| 1 | 78933<br>C08 | 14 | WBC | 62  | 155 | CCCTTGTTTCATCAGtgaagaccc | 100  | 2  |       |           | multiple hits                    |
| 1 | 80852<br>A07 | 14 | WBC | 33  | 126 | ATAGAATAAAGGAAAtgaagaccc | 100  | 3  | plus  | 31122332  | no Refseq gene within next 100kb |
| 1 | 79697<br>C09 | 14 | WBC | 26  | 119 | GGAACTACTTTTTCCtgaagaccc | 100  | 4  | plus  | 185981905 | 35854bp in Exon 9 of FLJ33167    |
| 1 | 80852<br>A06 | 14 | WBC | 60  | 153 | CATAGTTTCAAATAAtgaaggccc | 100  | 5  | minus | 59965457  | 66256bp in Intron 7 of DEPDC1B   |
| 1 | 79697<br>E09 | 14 | WBC | 93  | 186 | GTGGGAGGATCGCTTtgaagaccc | 100  | 6  | minus | 109393783 | 117465bp in Intron 17 of ARMC2   |
| 1 | 78933<br>D08 | 14 | WBC | 29  | 122 | ACTTTTAGGTCACTTtgaagaccc | 100  | 7  | plus  | 7671363   | no Refseq gene within next 100kb |
| 1 | 78933<br>A09 | 14 | WBC | 49  | 142 | GAAAGTTATTTAGTTtgaagaccc | 100  | 8  | plus  | 124166005 | 11904bp in Intron 4 of MGC21654  |
| 1 | 80852<br>G07 | 14 | WBC | 24  | 117 | GAACGGTCCTCTGActgaagaccc | 100  | 15 | plus  | 48215414  | 16703bp upstream of ATP8B4       |

|   |              |    |     |     |     |                            |      |    |       |           |                                     |
|---|--------------|----|-----|-----|-----|----------------------------|------|----|-------|-----------|-------------------------------------|
| 1 | 79697<br>F09 | 14 | WBC | 23  | 116 | CAGGATAGGATGCAGtgaaagaccc  | 100  | 18 | minus | 40593847  | 58380bp in Intron 1 of<br>SETBP1    |
| 1 | 78933<br>H07 | 14 | WBC | 119 | 212 | TTAAGAGCTTGAGGctgaaagaccc  | 99.2 | 20 | minus | 30763159  | 31877bp in Intron 3 of<br>COMMD7    |
| 1 | 78933<br>A08 | 14 | WBC | 207 | 300 | ATACAGGTTCCAGGGtgaaagaccc  | 99.1 | 20 | plus  | 237848    | 8887bp downstream of<br>ZCCHC3      |
| 1 | 80852<br>C06 | 14 | WBC | 21  | 114 | ACAAACAATGGAAGctgaaagactc  |      |    |       |           | multiple hits                       |
| 1 | 78933<br>G08 | 14 | WBC | 28  | 121 | CCAACGACCTTGATCtgaaagaccc  |      |    |       |           | no hit                              |
| 1 | 80852<br>B07 | 14 | WBC | 3   | 96  | AATtgaaagaccc              |      |    |       |           | too short                           |
| 1 | 80852<br>A08 | 15 | WBC | 76  | 169 | GTGTGGCCTAATAAtgaaagaccc   | 98.7 | 2  | plus  | 36543852  | 48804bp in Intron 2 of<br>CRIM1     |
| 1 | 80852<br>H08 | 15 | WBC | 159 | 252 | ATCTTAACAAACAGGtgaaagaccc  | 100  | 3  | plus  | 15815709  | 2372bp upstream of<br>ANKRD28       |
| 1 | 80852<br>A09 | 15 | WBC | 89  | 182 | GTTAAGATATTTTCATtgaaagaccc | 100  | 3  | minus | 159553012 | 242418bp in Intron 5 of<br>MGC12197 |
| 1 | 80852<br>G08 | 15 | WBC | 21  | 114 | TTTCATTCAAGAATCtgaaagaccc  | 100  | 13 | plus  | 77171831  | 41659bp upstream of<br>FLJ30046     |
| 1 | 78933<br>C09 | 15 | WBC | 9   | 102 | AATTGTGATtgaaagaccc        |      |    |       |           | too short                           |
| 1 | 80852<br>G09 | 15 | WBC | 3   | 96  | AATtgaaagaccc              |      |    |       |           | too short                           |
| 1 | 78933<br>G10 | 21 | WBC | 68  | 161 | TTTGATTCTTTGAGGtgaaagaccc  | 98.6 | 2  | minus | 106249125 | no Refseq gene within<br>next 100kb |
| 1 | 79697<br>A10 | 21 | WBC | 68  | 151 | TTTGATTCTTTGAGctgaaagaccc  | 100  | 2  | minus | 2658697   | no Refseq gene within<br>next 100kb |
| 1 | 80852<br>B11 | 21 | WBC | 128 | 221 | TACAAGGGTTATTTTgaaagaccc   | 99.3 | 3  | plus  | 103277943 | no Refseq gene within<br>next 100kb |
| 1 | 79697<br>H10 | 21 | WBC | 137 | 230 | AATATGACTGACATCtgaaagaccc  | 100  | 5  | minus | 10558333  | 40196bp downstream<br>of ROPN1L     |
| 1 | 78933<br>E11 | 21 | WBC | 167 | 260 | TGCTTTGTGTCGCAGtgaaagaccc  | 98.3 | 7  | minus | 23111987  | 193bp upstream of<br>C7orf30        |
| 1 | 80852<br>H10 | 21 | WBC | 129 | 222 | AACCCAGTAATGGCTtgaaagaccc  | 99.3 | 7  | plus  | 130154856 | no Refseq gene within<br>next 100kb |

|   |              |     |     |     |     |                           |      |    |       |           |                                         |
|---|--------------|-----|-----|-----|-----|---------------------------|------|----|-------|-----------|-----------------------------------------|
| 1 | 78933<br>E02 | 21  | WBC | 22  | 115 | AGGTGCCATTCTTTTgaaagaccc  | 100  | 12 | minus | 121193424 | 16278bp in Intron 1 of<br>MGC35140      |
| 1 | 80852<br>A10 | 21  | WBC | 75  | 168 | AACCTCTCAAGTGATtgaagaccc  | 100  | 16 | minus | 12406575  | no Refseq gene within<br>next 100kb     |
| 1 | 78933<br>H10 | 21  | WBC | 176 | 269 | CCCCACCCACCTActgaaagaccc  | 99.5 | 17 | minus | 7181218   | 612bp in Intron 1 /<br>Exon 1 of CENTB1 |
| 1 | 78933<br>A11 | 21  | WBC | 86  | 179 | TGCAAAGATTGTTTtgaagaccc   | 100  | 18 | plus  | 27468862  | 49764bp in Intron 5 of<br>B4GALT6       |
| 1 | 78933<br>D10 | 21  | WBC | 115 | 208 | GTCTGGGGTTCAAActgaaagaccc | 97.4 | 19 | plus  | 44428610  | 1159bp upstream of<br>IL28B             |
| 1 | 80852<br>F12 | 21  | WBC | 101 | 194 | TCCCCTCAGTCTCAtgaaagaccc  | 100  | 20 | plus  | 5573746   | 34074bp upstream of<br>KIAA1434         |
| 1 | 78933<br>B11 | 21  | WBC | 20  | 113 | AAAGCCAATGAAGtgaagaccc    |      |    |       |           | no hit                                  |
| 2 | 78933<br>A01 | 11  | WBC | 3   | 96  | AATtgaagaccc              |      |    |       |           | too short                               |
| 2 | 78933<br>A02 | 21  | WBC | 54  | 147 | CTGAATACTTACTATtgaagaccc  | 100  | 16 | minus | 28531941  | 3791bp upstream of<br>SULT1A1           |
| 2 | 78933<br>D03 | 30  | WBC | 68  | 161 | ACCCAAAGCAAAGActgaaagaccc |      |    |       |           | no hit                                  |
| 3 | 9084         | 13  | WBC | 79  | 172 | GTCTTTGTTTCATAGtgaagaccc  | 100  | 2  | minus | 136732882 | 23434bp upstream of<br>CXCR4            |
| 3 | 9085         | 13  | WBC | 285 | 378 | ACTCTTTCACATGAAtgaagaccc  |      |    |       |           | multiple hits                           |
| 3 | 9086         | 14  | WBC | 110 | 203 | GAGCTGAGATCGCGtgaagaccc   | 99.1 | 12 | minus | 120560220 | 10060bp in Intron 1 of<br>LOC283385     |
| 3 | 9088         | 15  | WBC | 89  | 182 | ACATTGGCACATCGtgaagaccc   | 100  | 12 | plus  | 18867724  | 84336bp upstream of<br>CAPZA3           |
| 3 | 9087         | 15  | WBC | 233 | 326 | AAAAAAGAAAGAAGtgaagaccc   | 99.2 | 13 | minus | 70133789  | no Refseq gene within<br>next 100kb     |
| 3 | 4065         | 152 | WBC | 212 | 305 | GGGGAAGGAAAAActgaaagaccc  | 99.6 | 1  | plus  | 181568775 | 106526bp in Intron 5 of<br>C1orf24      |
| 3 | 9706         | 335 | G   | 93  | 186 | CAAGGAGAGTTTGATtgaagaccc  | 94.6 | 2  | plus  | 128781865 | 10617bp in Intron 1 of<br>HS6ST1        |
